# Supplementary material for: Homologues of bacterial TnpB_IS605 are widespread in diverse eukaryotic transposable elements
Source: PubMed Central journal article supplement (PMC3627910; doi:10.1186/1759-8753-4-12), 2013-04-01

Additional file 5

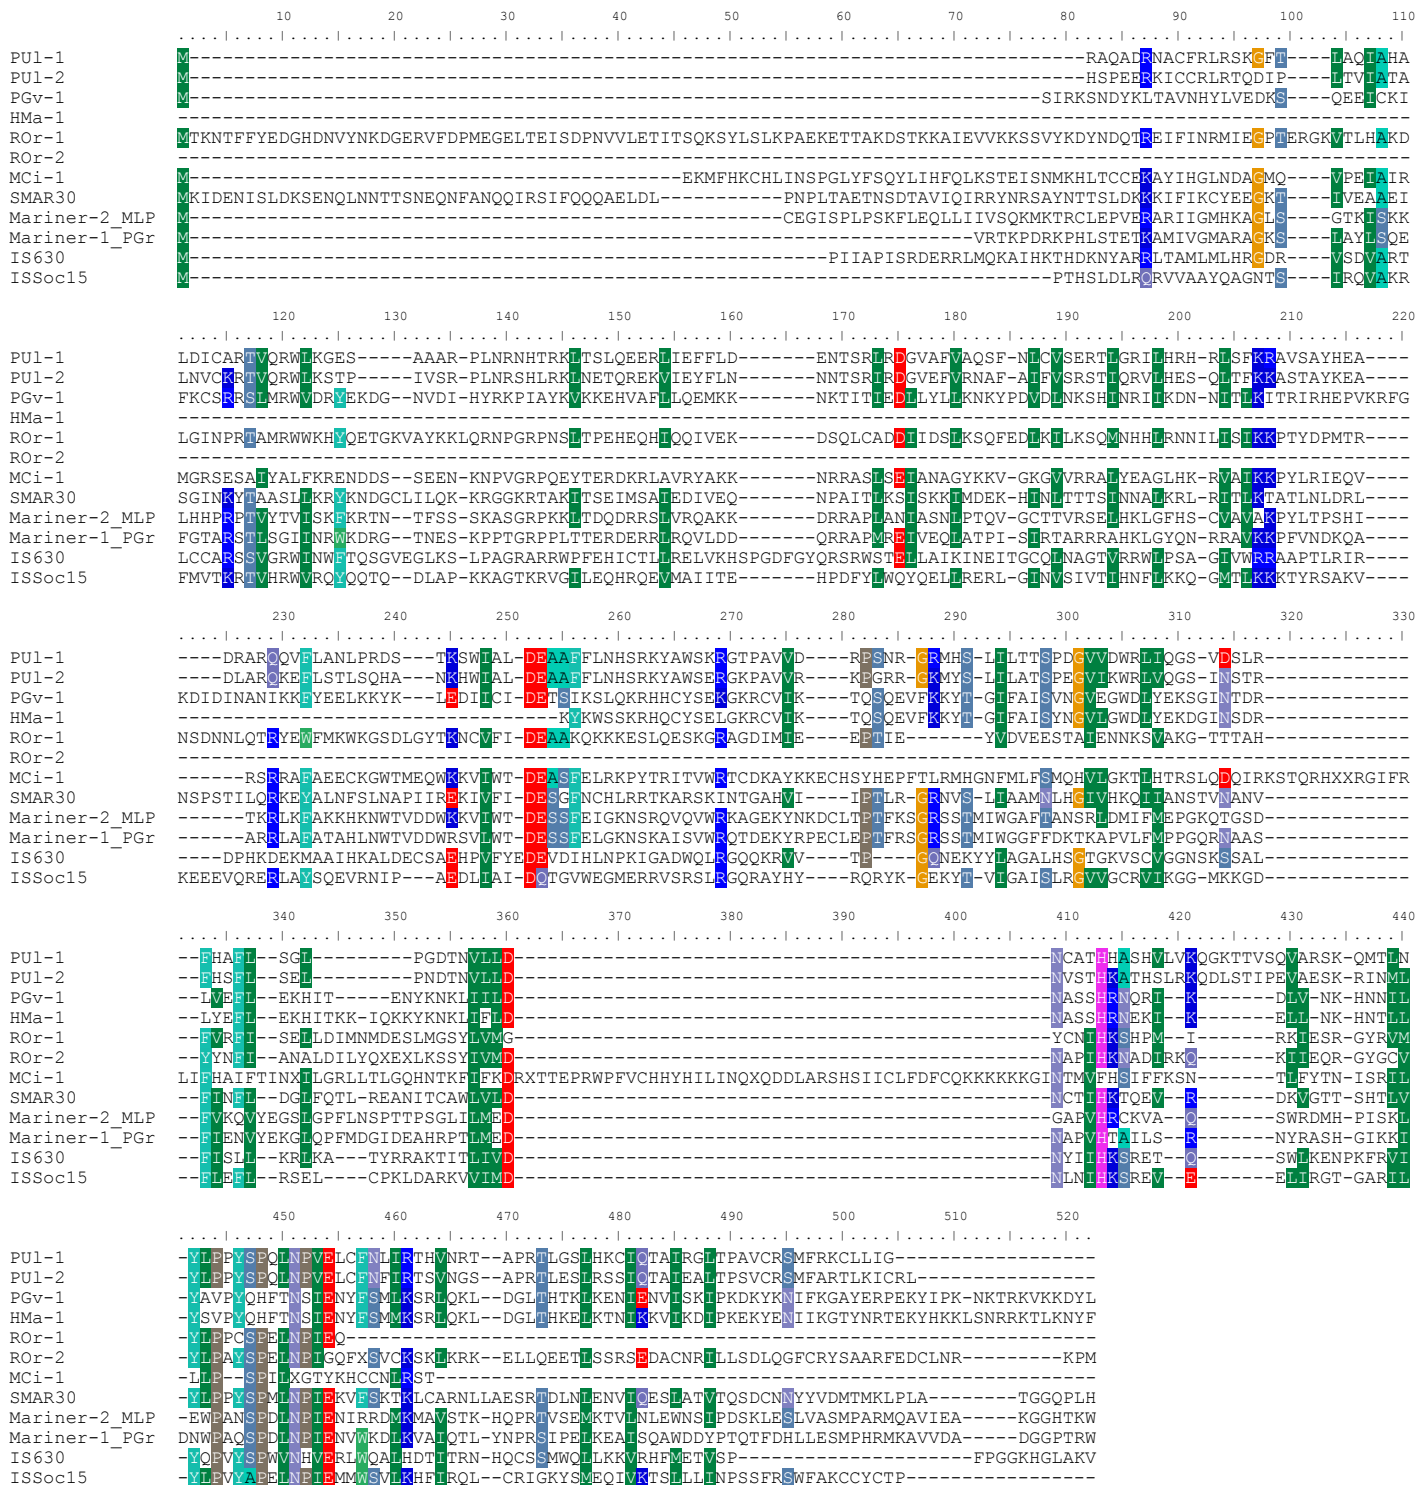

Supplement: 1759-8753-4-12-S5.pdf [file 1759-8753-4-12-S5.pdf]
