# Supplementary material for: Homologues of bacterial TnpB_IS605 are widespread in diverse eukaryotic transposable elements
Source: PubMed Central journal article supplement (PMC3627910; doi:10.1186/1759-8753-4-12), 2013-04-01
Supplement: 1759-8753-4-12-S6.pdf [file 1759-8753-4-12-S6.pdf]

PGv-1-2p  
(291-aa)

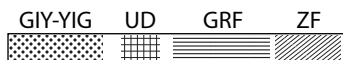

GIY-YIG

```

*          * *          *          *
PGv-1-2p      MRWIVYILKC-----ED-NYFYVGETAR-LYRRFWETAGICGLNTQIFKPEEIVALV---KVDIIGKFLEYN
AACY021487243.1  MPCTWLYVLTS-----NCDYVYVGYTHR-LITRNEMEGKCAVATSRRIYNTVQCVV---KIDVEQHNHAL
AACY022610711.1  MHWVYILKC-----NN-NNLVYGETKT-LYKRLNOHVNKGSKHTCDGTLESLNALV---KVOSLVRYLMYC
AACY023304359.1  MVHNIYVLEC-----SD-RNIYVGETTR-LYSRFSEIGGRGSVNTSSHSPRKLICLV---KVDDNSFFKYR
1YWL           MENKKSHVFVLLC-----QD-GSFYGEYTTE-PERRLENSGTCAKYTRLAKRRPVIMITERFERSEATKAE
YP_003786767.1  MENEFYVVILLC-----ED-GSYTVTNN-LKERFIKSKGKCAKYTKTHKPIKFLSAW---RVENISIALKIE
Penelope-5_NV_1p -TCNTKNVIMIOC-----NRCNLOYIGETKLKERFNDHRRTVDSQSRSIPT---HAAELI---FLKPNSASDIE
Penelope-1_OL_1p -SYKQSNVVYSHC-----KENCNEQYIGETKOPLHKRLYOHRRANPSG-----PESAVHLI---LKANHSFEDSE
Neptune2_Ren_2p -TCTSSNVILLITC-----LKCQKQYVGKTSRLRRERLCHRSSINNEPR-----YISKL---FNLPGHQLSHLK
Penelope2_Dw_1p -TMDKSNVVYRLPCNGTNEESCDKMYITTKSRLKTRLSOHRSDYKLRQHSNIQ-KTALMAL---CAASGHSPNFE
    
```

UD

```

PGv-1-2p      CAKYKDYFDKLEAFNNIAECM-----MLHNKDNWEKIRGGKVIKFNC
AACY023304359.1  GEGSCN-----LDIENHITELYFHLRNKEDDIEGVSSFRYNDGMTNKVNGGKYTKMFN
AACY022610711.1  VWNNKD---WALKVENFITEYL-----EE---NISVNGGKYVNDNK
AACY022686916.1  IWNNKQ---YALEIENFITECI-----LST---NENTEGGKYVNSNR
AACY020070058.1  MEGSKD---KAEEIENYVTEFI-----MSSVDDNKMVRGGKYMKGEK
AACY021487243.1  -----NHALENELLKIM-----RSRGGAWWKVRGGKYCGMTK
    
```

GRF

```

PGv-1-2p      PINNNIKELF-MCKGVFCD--LKKNDDKNY--LFFRCAKKNM-WENFKDDFDI--EDEPCNFEYITDIEFRIDE
AACY023293758.1  PNNQLAKELP-NCNGGFCD--VKQNENNY--LYFRCAKKNM-WDKMREEFGI--ADEPCKFEMKYTNDNKYKIEY
VDNDYILDRE-CDCMFECE--VKISKDKT--LYFVCSVKNI-WDDFDSGLQ--IEGPCDFYKVYTEDTYIKKAY
IPETSIVDRE-LCKCLLSE--VKLSKDKT--LYFVCALKNV-WGDFFAD-LQ--IDEPCDFWQMYTEDNAAKAEY
AACY022610711.1  LKKV----P-LCKCGLPAE--IKCVKNSKYKLYFTCIKNV--WSKMSSEFKINIHNFCYYFECMDGLEFRMIM
AACY022686916.1  NKKKSINNRP-ICKCGLPCE--VKIKPGKYKIYVCSKKNI-WEHMRERFNHLNIPKCONFYCEYLDDLEYRVKL
AACY020070058.1  GEKKEDDGRP-MCEGGIPCE--IVKROTKRKINFYVCPLKNV-WDEMRKEFKMIEIEKPCKYEEYMDDVEKRVMY
AACY021487243.1  PELRAIQGFEMCLCHYPVD--VMVA---KNGRKEATCACKNTDWLRGKVNVGYEIAGSTCNYERWTDGND-----
XP_002428087.1-1GRF finger  SSSNDLSIP-KCFCOLPAISRVVTKLGQNHGKLFYTONNONI-----SNKCNFEQWALFDGQTGNHA
XP_002428087.1-2GRF finger  VSKTKDTNVV-KCHCSVTKKOVNKEGPNKGKSFVCGNKNI-----DGKCNFEKWA-----
XP_394050.4, 1GRF finger    WGDIDENSVI-LCNCNENAIQLIVRKEGPNHGRAFYKCA-KEM-----NNRCDFFIWADNSGHIQN
XP_394050.4, 2GRF finger    -NNYNVATIV-KCNCNQLATTRIVKKDGPNKGRSFYTOP-KNM-----NESCKEQWADENEATCNN
EFN81542.1 1GRF finger      WGNIDNNAVI-MCNCHETAIQLTVRKEGPNICRLFYKCA-KPQ-----GSGCHFLWASSDESQANT
EFN81542.1 2GRF finger      WGSDASSNDV-LCCNOPARKLTVHKEGPNKGROFYGCP-KGL-----NSSCNFEQWADENTDQSSFS
    
```

ZF

```

PGv-1-2p      KKSFWLNNVECEIDDECE-CVSCNKYVWCDKNGEFKNNG-LEYGNERRLLCRDCFVNKNELSOKYSL---TCKCLIKL
AACY023293758.1  SKSHWLKELSGGQYHCVGGC-----GKEYDQNNTIRYLRMAINLCFDCFIDKNELAKKYNQNPVGKCLIOLKLM
AACY023304359.1  LKESWLSNIPVSLYKIHPEFCVMCKRTNL-----AIFAFTIVRRICOECMINKYDELKKDYSS---PGRCLMVD
AACY023344224.1  SRENWLNIPSSRYKIHPECISCSKTDL-----AIYN-NGIRRLCSCILKKYNDLKEKYDSS-----CLIKDT
    
```
