# Supplementary material for: Homologues of bacterial TnpB_IS605 are widespread in diverse eukaryotic transposable elements
Source: PubMed Central journal article supplement (PMC3627910; doi:10.1186/1759-8753-4-12), 2013-04-01
Supplement: 1759-8753-4-12-S7.pdf [file 1759-8753-4-12-S7.pdf]

Additional file 7

Mariner-1\_OlPv-2p  
Q8G4B6\_BIFLO Type II restricti  
Q0AK57\_MARMM Type II restricti  
Q727L4\_DESVH Type II restricti  
Yp\_001950543 Restriction endon  
Yp\_001045254 type II restricti  
Q64Q06\_BACFR Type II restricti  
Yp\_001454985 hypothetical prot  
EGE66164.1  
ZP\_08701146.1  
Yp\_001670968.1  
Q71S88\_KLEPN Restriction endon  
EGT83115.1  
ACYO20325231

MSDYGR-----IGDYIGPVA-----AKTSAV--IDANSSNHEFGGNDALRRLLTGCDERR---ASQGHGIPAL--MYLSD-DDAPAVADLETTMYDARR  
-----RLSDLFLCVA-----AKRDRAVE--AEPARSNHEFNGVAALRNMLG--DDR--TLAARF--ILLGD-DESPACDGSITMYDSRA  
-----NHGHLSEQYFAVA-----CKRLSAVM--ADLCRSNHEHLNGVEALIKMFRATEKH---TFQASF--MYLCDHDEPVVADGYVTMYDSRL  
M-RYGS-----LSDHFTGIV-----AKRLSTVM--ADTARSNHEFNGTNELRLRLG--GERI--ERRPSRF--IWLGG-ENEGITDDAPVTMYDARE  
-----MGEILNSAIVKIQNAKYAFCRITAN--TGKNGSHCAGFYIPKCAALLFDTPG-V---KGENKDKMV--KVKWQ-DDFTTDS--RFIYYGQ--  
-----MSGHLWLLDKSTSDTYMFIKRLSAN--TGATGGHGVGVIYPSGIVVHLLFSPINHT--RDLNPSVML--NAHTS-SHNCPSDEARAIYYNGRF  
-----SGLDWLLDKVGGNNYVLIKRLSAN--TGATGGHGVGVIYPSGIVVHLLFSPIDHT--SEKNPSVLL--RATYS-SHECVDSVSEARAIYYNNKY  
MAKMKHSTAFVDFLTFEPEAEASDFLTSLL-----DKSDSLYVKKLSVMKRDWARLSNKRKAGIYVPST-----ERDGNFPPLATKE-RDKAAAEIRETMYFEIWE  
-----RLSPGK-----FKTLISKE-RKSHFIT-----  
MNLTDV-----LIKTPDN-----IETFSAFIKQK-RDELISS-----

Mariner-1\_OlPv-2p  
Q8G4B6\_BIFLO Type II restricti  
Q0AK57\_MARMM Type II restricti  
Q727L4\_DESVH Type II restricti  
Yp\_001950543 Restriction endon  
Yp\_001045254 type II restricti  
Q64Q06\_BACFR Type II restricti  
Yp\_001454985 hypothetical prot  
EGE66164.1  
ZP\_08701146.1  
Yp\_001670968.1  
Q71S88\_KLEPN Restriction endon  
EGT83115.1  
ACYO20325231

-----NPNPSSAERRYKDK--CEPIRMARPGDLMCFGLMRNRLLIITIAQHDSTAEAAQAKWLFIGDDEQEVAFRF---HDNTERELDAFQAQFEALGINVEVRDDT-Y  
-----NQPHSGPWRYYQA--NDITRAMKPGDQLFVVLVLDRTIGLACDRSSDQGLVEAIFVQHSKSEQMVIIPV--SPTSSPADYFTFQLDLDALGIEPDIPIPF-D  
-----RHATR-TEYRYYFPP--CEVMTAREGDMMIVGLRREGDGMIVIGAGAGTTGESQLSWLFGLSPADGGYAVASP---ELLEQDIFGAGSYLEELGVIEAAGDDGG  
-----KNTRT-TEHRRYFPT--TAVSMCAEAGDLLIKRRTDNSVMIIAEEASTIASQVSWLFGFVDPVHPGFSVRSE--LECEQNRIFEFASRILEHIGVQVEEVAEN-Y  
-----RHPTR-SQWRYYFQA--NAVTEVAQAGDLLVARRSPGDMLMIVAPQSSTLENQIAWLFLGDLHGLGAGGFYEGF--EGAGDRGLDFVSNYVLEIEGIEPEVPEAD-R  
-----GTR-NYRRTRFYGGK-FPFEEEDNVGDLIIAQQSEDYIYGFVLTQDDIDDFAY-FNLSPEKTNQLIDVTQ--ASTPEKQLEIGIQLVALYA  
-----FGKTR-NKGRTRWGGKNLPQDPENTGALLALAFDHH-----QGSDSQFVDI-WCHNAEEEDIVESLGG--EIVFGSLVYGANEILGGLALKEPVSSG-YR  
-----FGQTR-NKGRTRWGAG-SLPQDPENTGALSVLAFEH-----PGRDSKSDVWV-WCVSPPEEDVLESVAG--EIIPTGLMFGPASEILGLVLSRPKIISQKEYV  
PTVGQVKRRLVHYTSKGEHHTGLP-----KPFPRDAPPASLLVVGK-SGGRYKALVWDESDEYEVVHDVLSLPPDFHSEIFITTVRREREKTVSFIIEVWRAFF-----DGT

Mariner-1\_OlPv-2p  
Q8G4B6\_BIFLO Type II restricti  
Q0AK57\_MARMM Type II restricti  
Q727L4\_DESVH Type II restricti  
Yp\_001950543 Restriction endon  
Yp\_001045254 type II restricti  
Q64Q06\_BACFR Type II restricti  
Yp\_001454985 hypothetical prot  
EGE66164.1  
ZP\_08701146.1  
Yp\_001670968.1  
Q71S88\_KLEPN Restriction endon  
EGT83115.1  
ACYO20325231

-----TTE---KFNNOVLSRMEANKLIK---KIIOEIKQIAPL-----  
LPMEIGRQYRFSNEEFAAFS-----QSSLTVDVDPDTH-D--DQVVE-YDRSLLRKLK---RAV---QHDYDAPFVS-----DG  
AASVVAQKGTPEPTATFSTLA-----RETLPLGLDP-RD-D--DKVLA-WIDR-SAMFRAL---RGI---QDRLMLGFLDS-----RG  
LEHLLSTGSARPEPTAFVSTYA-----RDSLPHVSS-LD-D--DGAIVA-WFQGRERFRMF---RHL---WAQRREGG-----  
LDEMLRLCGKRNTRDFSEYA-----RASLIDDP-RD-GA--DAALMA-FVEREITLFRLE---RHI---GDRLOVCG-----  
LDEIVGRGAQPESSRTFSALA-----RQNLPEVDP-RD-DA--DAALMA-WIEFEGALFRLE---RHI---VAARVEVGLT-----DG  
-----DPETROMAQOFARDIY-NKVHHTIDVHICK-S--DEQLK-WIDTEWGLRSPF---EKV---YAPIYSVF  
LPE---EARNPESGKEIIQYA-----AAHYSPIV---T-G--DKQLTE-RRRVEGLLVE---EMH---VLGIQSGF-----  
IPE---SKHSEFSGLDIIQYA-----AGYYPGV---T-S--DDQLTE-RRRIEDELMLV---EIH---VLDIRQCF-----  
MPT---DLAKPEFSGLEIVEKA-----VALRPDNG---L-S--DNRMER-RRDCEELRVS---QA---ELPNFAGF-----  
FPELASRFG-AMTTSSELAAARNRYLGENRLRSLDPYAMCK--GDA-RAISRGLELEIRKDYIKARS---DLARMLGDDPS-----KASLERVLR  
-----FALVYKTFCDL-----GYDQKNSDYFLN-M--SEYTA-LMRNCKKPEPPEKETTMRMSYLIIDEER-K-----DMSPYDAIR  
-----KDTAKKA---T--EVNQKEISTLLN-KQFSKAL-L-LEYS--QPLKEBAFNGV---LKELSKPKTPHNLEKLSNHFQNLIQEKTQFQELINTLG  
-----KAL-----EAKLEQVNERNELIKELRSRLPSCN-----

Mariner-1\_OlPv-2p  
Q8G4B6\_BIFLO Type II restricti  
Q0AK57\_MARMM Type II restricti  
Q727L4\_DESVH Type II restricti  
Yp\_001950543 Restriction endon  
Yp\_001045254 type II restricti  
Q64Q06\_BACFR Type II restricti  
Yp\_001454985 hypothetical prot  
EGE66164.1  
ZP\_08701146.1  
Yp\_001670968.1  
Q71S88\_KLEPN Restriction endon  
EGT83115.1  
ACYO20325231

--LSVLELLOLYNKLSISHOGLIOGNFLENDILVGLLELNNI---PKKVTINKSGIIVGFNEKKGKCYHIIDVIGENIEV---GKSITPKVTSCKTQRERHODDWSYTF--  
--VIDVDSF-T-SFYTSWRNRMSRAGVLEETI-AHILDAR--EEMAKTAN-----G---KEDDLFPQAQVEDPAPPEEQLRMLASKTSKDRRROVADAN--  
--EPVDADF-T-KFSLVQNRKRKSRAGHLEMMF-SKILRAF--PPTPQATK-----K---GAADLFPSEAAVADPGPSANLRMVAAKTSKDRRROVADAN--  
--GEVDADF-T-GYLSLVQNRKRKSRAGHLEMMF-EQVLKQGV--PPTPQATK-----N---SKEDLFPGCSEVHQTNPODQLRMLAVKTSKDRRROVADAN--  
--VDVDFG-V-TYLSLVQNRKRKSRAGHLEMMF-EVFNAGQV--QTRTPVTEN-----N---SKEDLFPDPIIHRDPPEDVSKLMLGVKTSKDRRROVADAN--  
--TAVDQEL-L-QFSLVQNRKRKSRAGHLEMMF-EBMLTVLGL--RARGARTG-----N---SKEDLFPQVAVADPGYADRLSMLGVKTSKDRRROVADAN--  
--PQCQEL-V-KFSLVQNRKRKSRAGHLEMMF-ATFTAAQV--EMEBQAVTEG-----N---KEDDLFPNGEAVHMLPPANKLVLEKAKTKDRRROVADAN--  
--GSVDF-L-ALANSVSNRKRKSRAGHLEMMF-EQVFNEL--KTETQAVTEG-----N---KEDDLFPQAQVHDEAPPEQLRMLAVKTKDRRROVADAN--  
--GSVDF-L-AMANSVSNRKRKSRAGHLEMMF-EQVFNEL--HHATQVTEG-----K---KEDDLFPQAQVHDDHPPREKLRMLAVKTKDRRROVADAN--  
--SSVDF-L-VRAQTLQRRKSRAGHLEMMF-RAVFIETQVENTHSHQVPSV--G---KEDDLFPQAQVQDNSPADQLRMLAVKTKDRRROVADAN--  
AVVLFPKI-D-ALLSAQQRKSRAGHLEMMF-DAMLADAV--PBEKVVLRA-----R---KEDDLFPSEKAMVESSTRQCALVLEKAKTKDRRROVADAN--  
DFTMYPHT-ITDLSLNTQSRKRKSRAGHLEMMF-ELMMGA--PVDVGAIGKSFQ---KNGIG--KLVDFVGVQVYTSN---KRNTMIKAKTKDRRROVADAN--  
EYTGSHSY-IVQLCHSNTQSRKRKSRAGHLEMMF-YIYIYELAF--SDSAAQVKKFTT---DLGLG--KLVDSVLEGIANSR---RDLIIGTKTKDRRROVADAN--  
--LLQVLEHFNFTVVSFQSKKCKIKKSEETAL-ENQLRLN--PVSVAIKCKGKIVGTGTTIKNHAHTLDILVGDSTIEHIKGEHISNYVLSCKSRERANDEWTFEH--

Mariner-1\_OlPv-2p  
Q8G4B6\_BIFLO Type II restricti  
Q0AK57\_MARMM Type II restricti  
Q727L4\_DESVH Type II restricti  
Yp\_001950543 Restriction endon  
Yp\_001045254 type II restricti  
Q64Q06\_BACFR Type II restricti  
Yp\_001454985 hypothetical prot  
EGE66164.1  
ZP\_08701146.1  
Yp\_001670968.1  
Q71S88\_KLEPN Restriction endon  
EGT83115.1  
ACYO20325231

IPKLI--LITLSDDYPPSTRFRDQIRKLTCTEKRKD-----DRIYKLFEN-LIEQ-----L  
IRDK--LITLTPGDVTHPKLAQDELHLEHVMKVKESDLDL--IAGETMFSR-LIEE---TGLQAD-----RQSLTLL  
IKPK--LITLTPK-TSLAQTENTDQGITLHLESPHSSDQD--ORASLLVAD-LIEE---LASL-----  
VSRK--LITLTPG-TSVQOTTEVDHVAQVLEIRGQSSQDA--QREELISLGE-IVGM---ADANLWS-----S  
IKSK--LITLTPG-TSENOTNMQKRSNOLVVEALQRTKTE--QQTWLLFDD-ITRL---IRIQS-----  
IDRK--LITLTPG-TSTHCTNEMIRHSDLVVBERGHTHTPE--QAGWLMVVRG-FINL---VAAREAA-----RPHY--E  
IETK--LITLTPG-TSKNOLNREKHEHKLVEBSYRTSDKE--FQPEELAS-ETEM---VKLKQSS-----KPIYS--V  
IQDI--LITLTPG-TSVAQFQENQOQERVLVVESSLHDKPKA--IREYLLSET-ETDE---TK-----SLYVD--  
INKI--LITLTPG-TSVAQFQENRAEGVTLVVESSPHKKPEE--IREYLLDGE-ETQ---LI-----TLYEDFV  
IPRK--LITLTPG-TSVAQFQENRAEGVTLVVESSPHKKPEE--VRPHQNLGSE-ETQ---VR-----NGIFAR--T  
DCDL--LITLTPG-TSVAQFQENRAEGVTLVVESSPHKKPEE--FENDIAARSKLWIA-----SLAATGV  
IREM--LITLTPG-TSETINILEYAN--VVVTTENKMKYK--NNNRLLPFD-MQSAEMLSKWNNVSVTSEKEEIQRSILKQIEKYSDFVYRNRNLSALPD  
IPNIR--LITLTPG-TSDNRAVQCTHNVVWVLEKQKHLK--DSSVLEFSEYLEIPNIMYWKK-----  
KPKLML--LITLTPG-TSVAQFQENRAEGVTLVVESSPHKKPEE--DRIYKLFEN-LIEE---VVVVVVVENVLKLSLAV
