# Supplementary material for: Homologues of bacterial TnpB_IS605 are widespread in diverse eukaryotic transposable elements
Source: PubMed Central journal article supplement (PMC3627910; doi:10.1186/1759-8753-4-12), 2013-04-01
Supplement: 1759-8753-4-12-S9.pdf [file 1759-8753-4-12-S9.pdf]

640 650 660 670 680 690 700 710 720 730 740 750 760 770 780 790 800 810 820 830 840

Helitron-1\_Pin RTR BIVDKMVC A BIPDK DTNP CLMSTVS QML GPCGANPS CA

Helitron-1\_HM ETS ODIDNLICA BIPDF IVNC FLYDITKT QMI GPCGILNPN SP

Helitron-4\_SMO RTI BIPDA RLDP BLVLDVKK HMI GPCGPEFPN SP

HELIBAT1 RSE DDIDRIVKA BIPDE DQCP RLFQIVKS NMV GPCGIONPN SP

HELITRON1\_CE RTS BIPDKIVQA BIPNE DNEP BLRIVTT AMMRPCGAQNP SP

Helitron-1\_AC --- TIDNVI SA BPNP SDDP SLVAVVTK NMI GPCGNFMNM AC

Helitron-1\_SLL CDA TCVDVSVSA QIPDP VTQP KLYSTVTK CMH GPCGPEHPG AR

Helitron-1\_AN LDA AMIDEMVSA BLPDE RDDL BLKLVKK HMI GPCGPEVYNS RA

HELITRON7\_OS ITI BIPDKIVST BIPDE RQDP LGMULIAE HMI GPCGAKNE CS

Helitron-1\_PGR VSP BPDNVI SA QLPNE TTSB RLSLVSE FAL GPCCKG -- RC

Helitron-1\_DR NNDNSNDH --- VVADLDTHTC BITE SDN VLSLVSE VOKIS --- TRIS KTC

Helitron-2\_DR EEDNDE --- TICDLDRI VSC KLDEB NVDP BLKLVSE VQLS --- RNS KSC

Helitron-5\_SMO LE --- QIKKFAENHCT --- DSKLDPD --- FKD VQTK PR KIC

Helitron-1\_DVir DLADESSIP --- SVKSFIDHHT BTPNP DVAP --- FLE VQTN YG HSC

Helitron-1\_NV QIDSD E --- DVTSLDKITTC --- --- IVLVN RQVR HS HIC

Helitron-1\_CQ DVSEDM --- ATTETINTCSI --- --- WLGPLGK KOEHA FT RIC

Helitron-1\_Cre DTADGMA --- SAPAFIDYASA --- KLDR EADP WLDLVRK YQTHG FT FIC

Helitron-2\_Cre RLRKALADPRSCP --- DVLDELSSVQWFW --- ASLFLS GGERP --- --- --- RDGIC

Helitron-3\_Cre RMRLEFEGPNC --- RALALAQALCAM --- WYBE --- YYP KGADVLVYGSYRVPGPSGGVVPWRVATISGSSGSPALDAAVAVPVVEAGNTAADAMCDDLPGPPEVPPAVDRLPAAHDFGIIAGSRLAQAAGAMAGGELGVKRLIR - KRCARLATV TAT --- TMT C

Helitron-4\_Cre LLERQFNHNAVGMARQASLDLWQPALQALALERM --- TCBAF FEAP TLLRRQPEPEF --- ADDLPRALAEIATLALPVPGATTSRDRPATYSLDVLRLRQAGWPCAQLDTTEVALDAETAPPALRWFRMSTTQQLLSAYDRVALARVHRCVLQACTH --- FT SPC

Helitron-1\_VCA RLQALFSGPNC --- RALALAYALCAM --- WYBE --- YYP --- FTRGAEHYVMDMTVEEAQQHGRAPPPVKSCPPAAAYDFGLRAGC --- AGGLPPPPHAAACRAHAAVRS --- THTT --- HN DTC

Helitron-2\_VCA NLQALFSGPNC --- RALALAYALCAM --- WYBE --- YYP --- TPDSGTQPLVMGMSDAEAQHGLPVPAVQDCPPAAAYFRLAGC --- ANGGLPPPSRHAACRAHAAVRS --- THTS --- HS SPC

Helitron-1\_PSO SQQMKEAI --- SSNAAPFT --- RLTVHCHLST --- TISVVBSPNRCFNEDAGELKPVVYGDYRKB --- LPGAHPITSCCQICNVKYRDKDVINAADIARNAVKLSPEINDFTRCSPRRNNDSSLSALPESLIVRD --- VQVHY --- WSA NPQ

850 860 870 880 890 900 910 920 930 940 950 960 970 980 990 1000 1010 1020 1030 1040 1050

Helitron-1\_Pin MKDGK CIKGYEKP LAEVIQAN ANGVYVYRRRRRGGVLFKFGREY --- DNATINQVVPYNP LLSQKNCNINVB VCHDIT AVKLVKYYVYKSPMVAIT

Helitron-1\_HM MKDGK CSKKYEPK FNANIVAV HNGVPRYRRR --- DNGLVINIKGN --- NVDRVVPYNP LLSKKYQAINVBE VCM SVK AVKLVKYYVYKSPMVAIT

Helitron-4\_SMO TKDGE CKSHYPERD YCEBTONV GGQPEYRRR --- QEGHTVLKKNK --- PIDNRVVPYNYKYL RKRRAINVBE VCGSTVK SVKLVKYYVYKSPMVAIT

HELIBAT1 MNGKH CSKGYEKP FQNATIGN IDGYPKYRRR --- SGSTISIGNK --- IVDNVWVYNP NCLCKVNCNINVB VCSAIR SVKLVKYYVYKSPMVAIT

HELITRON1\_CE MVDGK CSKRYEPK FHPSTILN DDGRYVEYGTQ --- HLDNRVVPYNYKWL LRYNAIMNVE ICSFIE AVKLVKYYVYKSPMVAIT

Helitron-1\_AC MKEGK CSKKYEPK LVTDITG HDGPLYRRRAPSDGGFTAKLKIRKTEVEVDRVVPYSEPLSKMBOAINVBE VNSIK SIKLVKYYVYKSPMVAIT

Helitron-1\_SLL MNGA CSKRYEPK FCABTRFG DDGPEYARP --- DNGRTYTPSG --- HVDNRVVPYNYALSAKNDCHINVE ICASVK AVKLVKYYVYKSPMVAIT

Helitron-1\_AN CDKHSDSNMIV TKRFYKA EGYEYH EBGVPLYRRRADDPRGAYR KAKNN --- DMVRIDNVVVPYNP LLSKRRSHINVE VQRGD VYKLVKYYVYKSPMVAIT

HELITRON7\_OS MKGK CSKGYEKP FNDQNET ENGAQYKRR --- NNNIYRKNH --- NLDNRVVPYNP HNLKRYQALHVE FVQSR VYKLVKYYVYKSPMVAIT

Helitron-1\_PGR MNGKS CKLGFYKP FAERIVNV DCAVPEYKS --- NDGQTVKHTT --- VFNNGSVVPYNP LLSLTLNQCINVE VEVNIT LKLVKYYVYKSPMVAIT

Helitron-1\_DR RKN --- TVCRFNERP PSSRIFITRYNA --- DNLKCKEGESLANKLIKVKVGLNS --- GVNFDSDVAFSSIQINQVPEQAYNCKSKKTIIVLRNPK DVMVQVYNP LLSLTLNQCINVE VEVNIT VYVYKYYVYKSPMVAIT

Helitron-2\_DR KCK --- VVCRFPKPL PMPKMITHPMPERDDEGDEPTSAAKKARRDAAKAMNEAKSKLPLWDLNDPKSSLDNLSDLLTKCNLSMDD LNYABGLTIGSAVL KRDPK ETWVQVYNP LLSLTLNQCINVE VEVNIT CHMMLSHVYKSPMVAIT

Helitron-5\_SMO KAYK --- NINCRFNIEP PMPQIBLPPK ITHKEDSVYIYKIKTILBD --- KIIDLNLEFDEYKIGITYQKATIR STITNKKIYKRPK DINTNIFNKLNSLQSNVDIQLDDPYA PLSGLSYIACIETEIT

Helitron-1\_DVir RREV RAQNICRFGIYFP PMPQIBLPLEE --- DAENKEVHRRFKIQGLVEYFPDRSEIDYLSDFNNFLTHDQNLNSYECVINALR SSIKPKIYKRSFA AIKLNAYNTE LLSLORANIDIQLLDDPYA CCSVMVYNYKSKSQRTIS

Helitron-1\_NV RKNY --- SSKCRFNIEP PMPQIBLPLEE --- DTPKEIKIYRDNKAIQVVLDE --- SKEGEDITFDQLVNLNITKQVLLAVSSINTPTVFLKRNPN ELRINNYNPDL SARRANMDOQLDDPYA CAVVYNYKSKSQRTIS

Helitron-1\_CQ MKN --- DKKCRFNIEYV PMPNEDRVVPLPA --- DDSRRSALKRALFRELLET --- KTFETLEDFLADCEETEEYVLEVIRAWLQRPAFFFKRPMN OLVNPFNVVIGGVLRNSLQQLIMDEYS CASLVYVYKSKSQRTIS

Helitron-1\_Cre --- GGLDGPORFLYAKD ACEATRIR DGMVVPYSEPL LLSLTLNQCINVE VEVNIT RAAVYVYKSKSQRTIS

Helitron-2\_Cre TTSKSHKATDSNCRMLERM LHWLITY HEQSVCHLRY HEQSVCHLRY AVKLVKYYVYKSPMVAIT

Helitron-3\_Cre KHCAGCAGVDCGMEYERL VRRRFOWI GSGGLFALRY GRMIVSHMVAVMAEGANNFTLAEVDRLQTEVAVALERDP --- PVQDPVAVVPTVMAQLRAHLSYKAVYKSPMVAIT

Helitron-4\_Cre --- WKLSIICRMIVGRDRVLLAEOLS PDGPLLLORT GEMIVSHMVAVALARGCANNCGTVDVGRLELAPQLGSAALLRW --- RATPDRRGCP LPRDNALDSFMSKAVYKSPMVAIT

Helitron-1\_VCA KHCGRGTDDSGMAFERV LRSAFOWI GTGGLFLLPRL GPNIVPHMVAALARGCANNQLEFLAEVDRVYTAEEAQAQLAR --- EDERGDCALLQPADRARD SAYSYSKAVYKSPMVAIT

Helitron-2\_VCA KHCGRGTDDSGMAFERL IRTAFOWI APNVPHEMVAHALARGCANNHMSLA EVDREYTDIAAQAQLAR --- PNERGDCSLQPAIDRARD SAYSYSKAVYKSPMVAIT

Helitron-1\_PSO FKPTRRTPKASVRSFKHE PRLNTIC --- DDGNDLQSRPIC SEVYVAYNRTMLTKQNDVQLVIGASA --- KNAAMLCYKMKQSPTE

1060 1070 1080 1090 1100 1110 1120 1130 1140 1150 1160 1170 1180 1190 1200 1210 1220 1230 1240 1250 1260

Helitron-1\_Pin LTVBEVRG GQASARREPNE LRELSARVTSVBAQMLRD FTIQGKHAWTODVHLESG TIC FRETEN PEAVLERG SHTMTRFF BLCAEEBQNH IARTMLYQ DTEKBEFC

Helitron-1\_HM VLNNEQVN HDEI NTPDCRYSAPPALWRIPE YPHSHMSHSIRKVLHPEN IVY FREGEE QVALDRA AQRDTHTAWKLNSENE GANRYSYV DTEYHFV

Helitron-4\_SMO VRRRDEEN QBYDGRYSABEHWRIYG YDHGRSHSERRDHELENL ONIY FNDGEE ETALORG RKTCTDWFBLNKIDE FARTLYH BTEBMYT

HELIBAT1 ICHSEKNI LNHDDEV QDEDSRYSAPEAVWRVLF MRMHDCSHARTLREHLEND ONLY FHADDF AEVLDRA KHNHSLMAWFLLRNDE DARNYYVMVIIIDNYNVE DTEYHYV

HELITRON1\_CE LNHQNVRL RHEHLDARYCAPEALHITG FKLKKAQSVTQ QLESS SQTDTLTAWKLNQKSKDIAESGNIPSTFV DSRQFFYM DMEHTHT

Helitron-1\_AC FCHTNER NDEV SOYLQCRYSSEAVWRVFS FPIHERHPTVHLSVHLENG RVY FTRDNA ETVAEEP PNTLTAFQQLCOODL FARTLYP EYBKYVT

Helitron-1\_SLL VVVGGQGA DVGIVHGADARQDEI QBYDGRYSABEHWRIYG FPMHEEKPTVLRPEVHLKDO IVF FNAHDD AENIINN RISKTCLEDFWFTANKDHP EGRHEPYQ DTEYHFV

Helitron-1\_AN MR --- SKVADEV DLYDARYCAPEAVWRVLR FPLHQEWPPYALVYHVPAR HLIV YNSAGD MRLEDCI DGGKSMGFF YNAHAANPANAAL ALNRVLYA KMPQFT

HELITRON7\_OS IIFQRIKQ GIDHSENEQTEKDEI EBYEORVYHCDQEMWRLLE YEHYHPPVVERMPEVHPLPM NMVK LTKDTK DNQRTLEDFWFMANQLEH EARNLYC ETEYHFV

Helitron-1\_PGR LSV --- DSKDEV RSYVDCRYSABEHWRIYG FPLSDRPPVTRVLAHDEDE VLV FEGCDD LAQIASG KANRTLTLYGELMADNALGADDV PARSIFYE DTEYHFV

Helitron-1\_DR LLRQRAQN EALNG ETIHTLHNSPEHSAQBSVRLFC MHLKCRSRKQVFPVQSNPV KMSLPLHLHNRQA QVMSYRRLVDRVYKRPQKE PLKDCLA SFCSPYRLLTKSE

Helitron-2\_DR GPKNVIQ SVREA NVNEEDEMKHMQAYAKRQVSAQBSVRLFC LPLKCSRSVFPVPTDDDL KMSLPLSVLLNKN PSSEVVMVSGLEKVRARPLTE EFKVCLA DFPASVRYVYGGQ

Helitron-5\_SMO KHSSTVFK KCQEE GTDAFNRVRLGNSFTRGRBMPIQOALPRLS IPPHMSRIVKRPDTKPBQO RKR LKMDD DSDTIDVWGLLEKVMORPE ELEDLTLA BITTEYIETEYV

Helitron-1\_DVir KLMRAVVS EISRG NVTLKQRLQHGHRFNSGTEHSAQBAVYCLE MSSESSNAVVRINTSLPEN RVGL RKSQQ LQNLPP DEVALTEIGLIDHYVORPD ALDSCLA DFAAVYFSKRRHS

Helitron-1\_NV ELRREACT EARQG NKTIQOQRDITGSRFLNVEISAQBAVYHLE LPMKSSRQRLINTSPPE RVLD LKPMDN INEMDD DESEITLSEGLKRYSKRPL KLENTLA DWAAVYDCAKPYD

Helitron-1\_CQ AFHRELLLELQYQP DYDYOGLKRLGVRVNSVQCSQBAVWRLR LPMSEASRKEBVPVTPMWPNE RTRC RKRHQ MDNEGLDD DSDTIDVWRINIVKYEDRD GLEDVCLA DFWAVYAPMKSTYK

Helitron-1\_Cre RKTIVQEA VGMPED --- APAAAVRRACTALSKREYSQBAVWRLR GSTLKLGRSSRATVLCRCPKQERPGIAAARNAPAANT DG ERDVLAINHYDYAARPLGLTGALGAPR (187) SWEDVSLF MFLSEF

Helitron-2\_Cre SRALIAAATMLRRR (74) SATVAALRTARVPVGAQAQREGMFNLAHANLLTAQTFSPAPAAALLMR GDAHESHQFRADYRMFSQHVQSG LKRADPELRPRDTQLRLVRTMGSVGAGSPPREGC LRAASTIASDVP

Helitron-3\_Cre AANLKALAATREF --- LAAPGAALGQGYAPTVENPAARFGNVMAAVNRLTISVYEMAMAAYLGG DEBITVYQTLTHGAFAA LAAPGAGPAGDSRWKEGKGGVDTIIVIPDEEDDG PDAPAAVTCVSHYLRGPTEL DCEBCP

Helitron-4\_Cre LEALMRAAYRLTRG (27) VAAATPQAPTAATAPAPPTTVSVLSAIIHAATGKMSRGLMAMAFQNLG YSTAYCSQDDVLDVQPLMSIVLNTQVPIQPH RYTHDT TRLRHLLNTDNIYRGPEL DSEWCA

Helitron-1\_VCA AQTICNALTRVQDF --- LLAGRTPNFAGSGPTAFGNLCATVYHMTATITAGMALVAMKLDG HSTFAPAEKAEVYNDAFATA LSAGAE QSPAAATTAAVLVEAEQGGYVYNAVYSVLRGBEL SGLDCSV

Helitron-2\_VCA AHTTCAVGRVQDF --- MMAGHRPSATGGDSTFGNLTVYHMTATITAGMALVAEKLSG HDTFOAYKRYVYHCAFTA LASESA VEPEDAETGVELVEAEHQGGYVYNAVYSVLRGBEL SGLDCSA

Helitron-1\_PSO NEVRFVGVFNKAV --- EKADRSTHHTAERRGYKLSMAYALTNQGEVAPMAGSLYHR GSPFWFSHEHTVYVYKMK LQSTNS --- PTVEITLPEDINSDSNGPVNSGKRKL --- TLEQTMR --- ETEKTHDYRSE





2530 2540 2550 2560 2570 2580 2590 2600 2610 2620 2630 2640 2650 2660 2670 2680 2690 2700 2710 2720 2730

Helitron-1\_Pin PCSEHGQLYVAMSRVTSRSRPFKALVEYPK--LEBEDGVYAQN  
Helitron-1\_HM PCSEHGQLYVACSRTRAFNSLFFKIDKHPIQGMVGEK-YYTNN  
Helitron-4\_SMO PVSEHGQLYVALSRGTSKSKOITMSIEQCEGGVQLQNHVYTKN  
HELIBAT1 PVSEHGQLYVALSRVRRACDVKVNTSSQKLL  
HELITRON1\_CE DVSEHGQLYVALSRVRRKKEGLVVKSSNI VTN  
Helitron-1\_AC PCSEHGQLYVACSRVGSNNLFWYAPGK TKN  
Helitron-1\_SLL PVSEHGQLYVALSCCTSERRHKVLPFHGS NDRRTVN  
Helitron-1\_AN PAVSEHGQLYVAMSRVTDVRRLSVLLPPGV RTTNN  
HELITRON7\_OS -----  
Helitron-1\_PGR DVSEHGQLYVAVSRVSDVEMLLVVRPANR SGILN  
Helitron-1\_DR KIPITAGQYVALSRVRSLSGLLIDDFQES --VIFCNEKIELTMSKMQ  
Helitron-2\_DR KIPITAGQYVALSRVRSLSGLLIDDFQES --KIYADPBITTSLERMK  
Helitron-5\_SMO KTKYPSQAMTALSRACITKGLTBYRPIEH --KHINKINDAAKEITIRMT  
Helitron-1\_DVir SRMQRAAMTVACSRATHASGLHPIGDFVP --PKPPKNDKQVQNETKLR  
Helitron-1\_NV KRAIPHIHYVALSRVTLIDGLMIDPLCES --KIAVNTDVQTEMHRLR  
Helitron-1\_CQ RSOEORIVYVALSRVTSLEGLMITYADNPSLDPSKEKPVFHHAKANNPAMRELRDEYKRLR  
Helitron-1\_CRe SVEDAGQYVALSRVRSIAGVLSQYVST SLEKVPSPQVSAEYERLR  
Helitron-2\_CRe -----  
Helitron-3\_CRe ICTSRACIYVWLVDRYSMDVQLRPLFTNSLERD--LVVKSFLQATQLPDDLAEDRLR  
Helitron-4\_CRe THVGRSRYVQLSRFTRFSDVRELRPLRPLTHGNAEQRE--HIIQKFTDAAIMSNDLQABLRLR  
Helitron-1\_VCA NGIKRATVYVLLDFKKTIDHVEHLRPLRPLTTPHERK--RIIKQFLSATNLEPDLAANRLR  
Helitron-2\_VCA GGLKRATVYVLLDFKKTIDHVEHLRPLRPLTTPHERK--RVVKQFMAATKLDPLAALRLR  
Helitron-1\_PSo PCMPHQIYVALSRVTSLSLNTLITDITP-----EYMQQFQPPTYVAEMLRQLALDVPVYIPSEELLKFSKICHNDHLLPSPFTYPPSLRVHSDPKDIEAFGPPARSGTSTTTCQATSGRVDSVRAERGESRCLPSWTRWRPGGPLMPFAGVAHFMLGLFCP---NQQLKRHGLKHAVSFPTETTTMTPEQAGESYRL

2740 2750 2760 2770 2780 2790 2800 2810 2820 2830 2840 2850 2860 2870 2880 2890 2900 2910 2920 2930 2940

Helitron-1\_Pin IVY RIFGSE  
Helitron-1\_HM VIF SNVNL  
Helitron-4\_SMO IVY KEIL  
HELIBAT1 VKH SESV  
HELITRON1\_CE IVF NEVL  
Helitron-1\_AC VVY KQVQL  
Helitron-1\_SLL VVY PEILTGFIRDWQVDFSPILTLFTKVFYSQIIFSSFTISGVSFIFISHQFINVIP  
Helitron-1\_AN VVY PEVLQDIASLDDVPDWDGGMVIDEAA  
HELITRON7\_OS LVVI  
Helitron-1\_PGR VVH RSLFKTKKLNFR  
Helitron-1\_DR LKHQRGGGVYVYCEKIECHIFTPSELWNLECLYFTVPH--VNLKAAVLYRPSYKIDVFRQHILHIEBLEKH--SGQKIIMGDFNDDIFT  
Helitron-2\_DR MAKKDCGGVALCKEDIQAE--PRHFIHHVTDLFVVIKVDAPVATIAAVYRPPDPSLGKFLPNIRGLLDYLEMK--ENPPIICGDFNEDHLS  
Helitron-5\_SMO --ALHTNDYKSEIVEHLKETMAMSYVLEKKN--KQLQIIMLRKPGNIIHPIKQLQKYIKIDN--KKPVITIGDFNIDYQI  
Helitron-1\_DVir NAPRPKRGIVLYTKNAILLNINSFCPSGRQISGSFVFEHAIFRY--KSVCFLVIYKSPSYPLGLFKTEFEVLFVQQLF--RERCIVLIGDFNLCISK  
Helitron-1\_NV QNVRPYGGTAVYSRLDYYPG--YPFCSNIHGVEITILRPMIIPHITIVGVSSPTVSI TELCNAMKTELDSL--TQINIFIGDFNVNWS  
Helitron-1\_CQ --RSGGVAIYRKTITTKTSMAPVYTPPELVSQDRDELFGVADKYGDVCAATVDVMG--TEVLLFSVYIIPGTTLKQKGFELARKLLOTART--GLPMVVTIGDFNVDSK  
Helitron-1\_CRe ATTADRSATGHLIATYQARPSAARLPPGAEAAWDRASARWNTVQAAQAQAADVGEMPAPTGAGREGGAAAGGHTGQRGRGRRRGLVLPQVAGHRRPRDGEDEGGVEDQRPARRVRAADAAATPAARVAAAPGASGSGGGAGANVAAC--LQQQRAGGGRACRQCCRGGAADGVGRTLADGTLASHSDYNAAVAWGDLTYYDFTSWAA  
Helitron-2\_CRe --AVM  
Helitron-3\_CRe --GVEGLTPEKKNAGDMAAASRPMQLGQPHGGVPGVGPPLDTPSPVASVSGGLPAGGASGAGHVEHSEVDVTACYLTAGVMRTLSPKPADVHCDVMEVLFRLQVFNNDLGHRRIQGVPRCYFMGTYFLDRVLPDLPHGSSVVFENVSRWTSLSRLRNLLAGAEDGLNSVDRIVVVHPDVSQAQADKAAVEEAEEASAS  
Helitron-4\_CRe --ATARAPPMLQYSRHPHPTGDFPPALPATIHSLATQAAIAAAHGPAPPVWFCHDFS--  
Helitron-1\_VCA -----  
Helitron-2\_VCA -----  
Helitron-1\_PSo SS--LMYQCIGLSLSDRSSNMQLYR

2950 2960 2970 2980 2990 3000 3010 3020 3030 3040 3050 3060 3070 3080

Helitron-1\_Pin -----  
Helitron-1\_HM -----  
Helitron-4\_SMO -----  
HELIBAT1 -----  
HELITRON1\_CE -----  
Helitron-1\_AC -----  
Helitron-1\_SLL -----  
Helitron-1\_AN -----  
HELITRON7\_OS -----  
Helitron-1\_PGR -----  
Helitron-1\_DR -----  
Helitron-2\_DR -----  
Helitron-5\_SMO -----  
Helitron-1\_DVir -----  
Helitron-1\_NV -----  
Helitron-1\_CQ -----  
Helitron-1\_CRe LL-----GCVRALPGCTHSWLYMPLIVDALLPGRARAAF--PFRPNQWRQLVGLLKAGAADAGLIAAQLLLDLWDHISAEAQVQLERCLGLIVSGICTKMATYALGQAVITITTLIRDAEARQLEAVQQQQQQQQQQQQ  
Helitron-2\_CRe -----  
Helitron-3\_CRe AAVPATEPRAARTSARLKKPMAAGHWMCGVVDLSSKRVVYDLSLQPSQDNKAVGGLLQWVKLASVAAQRPAAESEWSIVRPADVPRQRMRDCGAYTLFLFAYCMARGLNVPARDTPIDMKAARQAFYMLMTGRVGLRPLFPVG  
Helitron-4\_CRe ST-----QRRRGGQLITSSWLFMPLIADALLPTASAAHAF--PFQRPDQWLLTEPLRTGCAARAITADRIPLDAPWHATAAWQEVVLTALBEVELVQTLAALAASCQSGQGWADVQATLHAQQLVMLGTDI  
Helitron-1\_VCA -----  
Helitron-2\_VCA -----  
Helitron-1\_PSo -----
