# Supplementary material for: Homologues of bacterial TnpB_IS605 are widespread in diverse eukaryotic transposable elements
Source: PubMed Central journal article supplement (PMC3627910; doi:10.1186/1759-8753-4-12), 2013-04-01
Supplement: 1759-8753-4-12-S10.pdf [file 1759-8753-4-12-S10.pdf]

Additional file 10

10 20 30 40 50 60 70 80 90 100 110 120  
Sola2-2\_HM\_1p (371)-----IKTARHLKMQHGMIAEAPSKEGRSISEKKNLVEHEFVQSDDEYSMCPKQKQYVYIQVDGKQHFO-----KRLILLNRLGLMLVYV-----ISLDVKV--IGF  
Sola2-5\_HM\_1p (184)-----IQNAKLLRDQKGIAYPNVVERHRISKDIWLVKLEFCDDDEYSQMPKCKKQVSVG-----KPKYMS-----KYPDHK--IGF  
Sola2-1\_HM\_1p (166)-----AKMARQIFNFKGLLAIISPLYKGVKLVHKEEDSVKLEFDSDDCCTMSGKQVYVYIQ-----KNIHKQ-----KRLILLNRLGLMLVYV-----NNPEIQ--ISY  
Sola2-4\_Nv1\_1p -----VROVKQLVNEQGIILCTTRARSCHGISETDKQVWIDFVDSDDDEYSMPKQKQYVYIQVDGKQHFO-----KRLILLNRLGLMLVYV-----RCQNVV--IGF  
Sola2-5\_Aae\_1p (287)-----AATEAKQLLNKSGVHSTIGPRATTGLDENKHAHMCPWEDDEYSRAMPKCKKQVSVG-----KRLMTTTRRGLMLVYV-----LNTIQV--IGF  
Sola2-6\_Aae\_1p (263)-----ATEAKQLLNKSGVHSTIGPRATTGLDENKHAHMCPWEDDEYSRAMPKCKKQVSVG-----KRLMTTTRRGLMLVYV-----LNTIQV--IGF  
Sola2-2\_Aae\_1p (210)-----ITESK-----KYNLGIQPLS-KVGRPSHGSDVODVSNFPLRDDSDSPFFSKQVSVG-----KRLMLDPLDXLTKQYV-----TCKSQESVVSF  
Sola2-3\_SP\_1p -----LPSASAEKRRKTGPPKVSSEDVTKVLEDVEEDNVSQAQPKKQVYVYIQVDGKQHFO-----ARHETASLRETVAFVCG-----IYPEVH--VGK  
Sola2-2\_SP\_1p (119)-----SDYSNGPTKVTDECEALSTVYCRDDISWQSNPKKQVYVYIQVDGKQHFO-----KRLIMTLRGLMLVYV-----ENPDQS--VGL  
Sola2-1\_BM\_1p (164)-----RKLAKYRMLRHRKIKKQKRGNTVLKRRKHDFPRLIDDSASLKKRRTVRR-----KVKKQ-----LRLNDTLRLNPKTENN-----KTGLN--ISY  
Sola2-1\_Hrobusta\_1p (131) AKQYQPGNRIRAEYETQFQALGRSDINKTDANKKKMEDLKEFYAQTTLTSPSSCKSTKNQK--DANNITVRSVTPIRKLDLQPSLTAQAYVYVFIKAKYKDCSDNDEKTPHHR  
Dfa-2 (171) VHKYGAGRLINAEELSNWRSKFTHNGQMTRRQRTMRTAVRGEYFNMKDTEESSKNMRLYKELDADGKRAFLVPIKRLALGNLNTCTDYL-----KSEVDQVKYPIVGR  
Ppa-1

130 140 150 160 170 180 190 200 210 220 230 240  
Sola2-2\_HM\_1p SKKCELRKRCWICPIVGGASGLHNSVCCVEYHONAKLIALKLV-----PPISDYKN-----LTLVYCD--LNRDGLMHCQNDP--NDTLKELYLLTFLDKH--  
Sola2-5\_HM\_1p SKKCSLRKRCWICPIVGGASGLHNSVCCVEYHONAKLIALKLV-----GLETSYHE-----LIEKVCSS--RKSQVMIHRNSCPG--IQAAQIYFQOYLTQDDPKE  
Sola2-1\_HM\_1p SKKASLRKRCWICPIVGGANGTHNSVCCVEYHONAKLIALKLV-----NIGLKYKD-----LLSKTVCS--VENKCEMLAQNDP--KETLTKYMYEIFEGY--  
Sola2-4\_Nv1\_1p -----K-----LTKMFKLS--MFQKQCYVILVYKIELLKNVHNSLALVNSP-----  
Sola2-5\_Aae\_1p TLPMTLRKRCWICPIVGGASGLHNSVCCVEYHONAKLIALKLV-----GIVSQAI-----CEKLDQVLRVTRTPCFRCEKONS--KENITGELISLLES--  
Sola2-6\_Aae\_1p SSPAKLRKRCWICPIVGGASGLHNSVCCVEYHONAKLIALKLV-----GSLNELKV-----FTDSTGCG--NATVDCFLRRCGEND--TTSLEKLLKLEEMDEK--  
Sola2-2\_Aae\_1p SSKWKLKRCWICWYTKDSSAMVCCVCHIEHNSMKEFVDAIKKTCNCFVHNTEKTKKLIALKLFIQKKKLLTFLTSQVCP--DSTGRCYLRSCEPDKL--KKL--DFVANRNDEN--  
Sola2-3\_SP\_1p SKKACRCRKHV-----LSQKLFHNSVCCVEYHONAKLIALKLV-----HKAQCP--EFPAYTRD-----LPALVCK--QPSRECMWNECABCKD--GAGFSKAFS--FEGS--  
Sola2-1\_SP\_1p SKKCSLRKRCWICPIVGGASGLHNSVCCVEYHONAKLIALKLV-----GSLNELKV-----FTDSTGCG--NATVDCFLRRCGEND--TTSLEKLLKLEEMDEK--  
Sola2-2\_SP\_1p SKKCSLRKRCWICPIVGGASGLHNSVCCVEYHONAKLIALKLV-----GSLNELKV-----FTDSTGCG--NATVDCFLRRCGEND--TTSLEKLLKLEEMDEK--  
Sola2-1\_BM\_1p ETRRRHREFVW-----FPKTTSTRITCLCRQALNNDYASALHQAQIISFSNATD-----VARSLCCDN--ILRVSCLERTCLTCE-----KTL  
Sola2-1\_Hrobusta\_1p SLPYKRVSDVKIENNR-----LPSASAEKRRKTGPPKVSSEDVTKVLEDVEEDNVSQAQPKKQVYVYIQVDGKQHFO-----ARHETASLRETVAFVCG-----IYPEVH--VGK  
Dfa-2 SLPYKRVSDVKIENNR-----LPSASAEKRRKTGPPKVSSEDVTKVLEDVEEDNVSQAQPKKQVYVYIQVDGKQHFO-----ARHETASLRETVAFVCG-----IYPEVH--VGK  
Ppa-1 SLPYKRVSDVKIENNR-----LPSASAEKRRKTGPPKVSSEDVTKVLEDVEEDNVSQAQPKKQVYVYIQVDGKQHFO-----ARHETASLRETVAFVCG-----IYPEVH--VGK

250 260 270 280 290 300 310 320 330 340 350 360  
Sola2-2\_HM\_1p -----SIEEINR-----QKANKKHDVPTV-----LPVDD-----FQKACQD--LRLD--HHTARN--AA-----LQHLKI  
Sola2-5\_HM\_1p QYDSDENEQSVK-----ATTDRT--ELTLIQ-----LPINE-----FELLCEKLRKTS--SISIAHSQSS--YKXHKK--  
Sola2-1\_HM\_1p -----EDDFEHRK-----WOTDRA--TLLSLT-----ADVST-----FVELLVSCFEKLAQ--SISIAHSQSS--YKXHKK--  
Sola2-4\_Nv1\_1p -----NMVQNGV-----KPVDD-----FMSLSLSL--KRLI--HHTARN--NSK-----YKXHKK--  
Sola2-5\_Aae\_1p -----DKEDVPE-----LTTDRC--NETI-----KPEEE-----FVITYFEKVDKLI--DITCKE--SS--YKXHKK--  
Sola2-6\_Aae\_1p -----FVDEIPE-----WTTDRC--DETFT-----KQKEE-----FVSYFIQK--KRLI--DITCKE--SS--YKXHKK--  
Sola2-2\_Aae\_1p -----NVEEYKCF-----WISPRC--EINKE-----ENVND-----FENLKNLTK--FLVY--QEKVDK--NX-----YKXHKK--  
Sola2-3\_SP\_1p -----LNSPCSWL-----WETDKDRMKIQE-----EGTVE-----LQHTAI--FLO--CVKRE--AS-----AYNAQR--  
Sola2-1\_SP\_1p -----ADDEAEM-----WITVEGK--ATKSIQ-----RGTSG-----CKSIRQOQ--PGLI--TITK--KOSA-----HFERK--  
Sola2-2\_SP\_1p -----DVTVINGNDIT--YK-----WVTKVPOI--KGNELKQKTLKECV--RTSHQLL--NKNFIS--STFMO--LANIMN--YK-----ALRYIK--  
Sola2-1\_BM\_1p -----DVTVINGNDIT--YK-----WVTKVPOI--KGNELKQKTLKECV--RTSHQLL--NKNFIS--STFMO--LANIMN--YK-----ALRYIK--  
Sola2-1\_Hrobusta\_1p -----DVTVINGNDIT--YK-----WVTKVPOI--KGNELKQKTLKECV--RTSHQLL--NKNFIS--STFMO--LANIMN--YK-----ALRYIK--  
Dfa-2 -----LTKEDD--DFKTKI--KEFV--K--K-----DFEK--K--  
Ppa-1 -----R--R--G-----LSDQDKHLFEILTI--KMFV--Q--RNDYLTCTV--IILLIHLVNDLLMKF--EFFIK--N

370 380 390 400 410 420 430 440 450 460 470 480  
Sola2-2\_HM\_1p -----T--ASNHLI--L--L--D--P--E--N--S--F--L--D--A--V--G--H--W--N--S--A--L--P--F--V--Y--M--E--E--N--K--K--K--S--C--I--S--D--N--O--H--N--S--V--H--C--F--H--E--V--K--H--K--H--L--I--P--Y--F--N--C--I--V--S--D--A--S--O--Y--K--N--Y  
Sola2-5\_HM\_1p -----T--SIDA--I--L--G--P--A--N--Y--T--F--V--D--E--I--O--S--Y--H--W--S--K--S--C--S--L--P--V--Y--Y--K--V--R--E--I--S--S--F--V--I--S--D--S--L--D--V--G--F--L--N--E--W--M--H--T--N--H--K--H--L--P--A--K--I--H--Y--S--D--C--A--G--O--Y--K--N--C  
Sola2-1\_HM\_1p -----N--D--Q--S--N--I--I--G--P--A--N--Y--T--F--V--D--E--I--O--S--Y--H--W--T--Q--C--S--L--P--V--Y--Y--K--D--K--G--V--K--H--I--S--Y--C--I--S--D--D--T--H--D--V--Y--Y--K--I--F--Q--L--I--P--I--L--K--K--F--S--N--L--S--K--L--H--L--I--D--C--A--G--O--Y--K--N--C  
Sola2-4\_Nv1\_1p -----N--L--Q--E--N--G--L--E--M--D--Y--S--E--N--Y--T--F--V--D--E--I--O--S--Y--H--W--N--D--Q--C--I--N--V--A--L--V--Y--R--E--D--N--E--T--R--H--C--S--I--A--L--S--E--C--T--H--T--A--A--V--I--L--Q--E--I--S--E--K--K--F--P--K--M--K--I--V--D--A--K--Q--H--K--N--K  
Sola2-5\_Aae\_1p -----F--Y--E--T--K--N--S--L--K--E--G--E--L--I--S--F--E--N--Y--T--F--V--D--E--I--O--S--Y--H--W--N--S--A--L--P--F--V--Y--M--E--E--N--K--K--K--S--C--I--S--D--N--O--H--N--S--V--H--C--F--H--E--V--K--H--K--H--L--I--P--Y--F--N--C--I--V--S--D--A--S--O--Y--K--N--Y  
Sola2-6\_Aae\_1p -----K--K--K--N--L--K--E--G--E--L--I--S--F--E--N--Y--T--F--V--D--E--I--O--S--Y--H--W--N--S--A--L--P--F--V--Y--M--E--E--N--K--K--K--S--C--I--S--D--N--O--H--N--S--V--H--C--F--H--E--V--K--H--K--H--L--I--P--Y--F--N--C--I--V--S--D--A--S--O--Y--K--N--Y  
Sola2-2\_Aae\_1p -----S--V--E--N--K--E--L--M--Q--D--E--F--E--N--Y--T--F--V--D--E--I--O--S--Y--H--W--V--R--P--V--I--P--F--Y--Y--K--K--S--S--L--V--I--N--S--V--I--L--I--K--H--N--T--S--V--A--F--O--T--K--S--R--K--N--K--F--P--E--L--K--I--Y--L--D--C--C--E--G--O--Y--K--N--C  
Sola2-3\_SP\_1p -----D--N--E--V--A--L--Q--V--D--E--F--E--N--Y--T--F--V--D--E--I--O--S--Y--H--W--R--Q--R--V--S--L--F--T--A--A--N--K--L--M--Q--H--V--A--S--D--N--T--S--K--E--T--M--A--Y--D--T--E--D--P--H--G--V--K--L--W--V--S--D--P--A--S--O--Y--K--N--C  
Sola2-1\_SP\_1p -----K--V--S--P--E--H--D--H--S--A--L--Q--V--D--E--F--E--N--Y--T--F--V--D--E--I--O--S--Y--H--W--R--Q--R--V--S--L--F--T--A--A--N--K--L--M--Q--H--V--A--S--D--N--T--S--K--E--T--M--A--Y--D--T--E--D--P--H--G--V--K--L--W--V--S--D--P--A--S--O--Y--K--N--C  
Sola2-2\_SP\_1p -----K--A--D--G--R--H--I--V--Q--V--D--E--F--E--N--Y--T--F--V--D--E--I--O--S--Y--H--W--N--E--V--I--F--T--G--C--A--N--I--G--N--G--V--E--S--A--L--V--D--D--V--G--K--Y--Q--V--A--T--F--E--H--I--M--E--L--K--K--S--C--P--E--M--E--V--S--D--A--S--O--Y--K--N--C  
Sola2-1\_BM\_1p -----N--L--S--P--S--L--H--I--D--F--E--S--K--S--C--K--Y--G--S--V--O--S--A--H--G--G--K--S--L--S--L--P--C--Y--I--S--V--D--S--Q--P--P--N--L--K--T--I--C--T--V--S--E--N--R--P--V--L--C--A--H--K--F--E--K--I--L--I--T--P--L--L--H--I--S--D--P--A--T--O--Y--K--N--C  
Sola2-1\_Hrobusta\_1p -----S--L--Q--H--S--A--V--H--I--D--F--E--S--K--S--C--K--Y--G--S--V--O--S--A--H--G--G--K--S--L--S--L--P--C--Y--I--S--V--D--S--Q--P--P--N--L--K--T--I--C--T--V--S--E--N--R--P--V--L--C--A--H--K--F--E--K--I--L--I--T--P--L--L--H--I--S--D--P--A--T--O--Y--K--N--C  
Dfa-2 -----S--L--T--K--D--V--I--L--L--K--R--E--N--I--L--G--V--E--S--Q--N--F--G--K--P--R--I--L--G--M--V--Y--R--D--P--A--T--N--E--V--K--E--H--D--P--S--V--N--C--S--S--Y--I--H--S--K--L--F--F--S--L--F--K--R--A--H--F--S--I--E--P--S--D--A--K--H--K--S--A  
Ppa-1 -----E--L--K--A--G--E--L--L--C--R--E--N--I--L--G--V--E--S--Q--N--F--G--K--P--R--I--L--G--M--V--Y--R--D--P--A--T--N--E--V--K--E--H--D--P--S--V--N--C--S--S--Y--I--H--S--K--L--F--F--S--L--F--K--R--A--H--F--S--I--E--P--S--D--A--K--H--K--S--A

490 500 510 520 530 540 550 560 570 580 590 600  
Sola2-2\_HM\_1p -----K--N--L--S--L--C--H--R--K--D--H--D--V--S--A--W--H--E--A--T--S--H--G--K--G--A--C--D--G--G--V--N--K--L--V--A--R--A--S--I--Q--S--L--V--D--P--I--N--S--K--K--M--D--W--C--R--N--I--D--G--H--F--O--I--S--N--D--A--V--T--L--H--C--M--K--F--E--R  
Sola2-5\_HM\_1p -----K--H--F--Y--N--L--C--H--H--A--D--F--S--V--Q--C--I--N--N--F--E--A--T--S--H--G--K--G--A--C--D--G--G--V--N--K--L--V--A--R--A--S--I--Q--S--L--V--D--P--I--N--S--K--K--M--D--W--C--R--N--I--D--G--H--F--O--I--S--N--D--A--V--T--L--H--C--M--K--F--E--R  
Sola2-1\_HM\_1p -----K--S--F--Y--N--L--C--H--H--A--D--F--S--V--Q--C--I--N--N--F--E--A--T--S--H--G--K--G--A--C--D--G--G--V--N--K--L--V--A--R--A--S--I--Q--S--L--V--D--P--I--N--S--K--K--M--D--W--C--R--N--I--D--G--H--F--O--I--S--N--D--A--V--T--L--H--C--M--K--F--E--R  
Sola2-4\_Nv1\_1p -----Y--Q--M--N--L--V--N--H--S--D--F--Q--I--M--A--D--W--H--E--A--T--S--H--G--K--G--A--C--D--G--G--V--N--K--L--V--A--R--A--S--I--Q--S--L--V--D--P--I--N--S--K--K--M--D--W--C--R--N--I--D--G--H--F--O--I--S--N--D--A--V--T--L--H--C--M--K--F--E--R  
Sola2-5\_Aae\_1p -----K--K--I--A--S--L--N--H--K--K--I--Y--G--E--A--W--H--E--A--T--S--H--G--K--G--A--C--D--G--G--V--N--K--L--V--A--R--A--S--I--Q--S--L--V--D--P--I--N--S--K--K--M--D--W--C--R--N--I--D--G--H--F--O--I--S--N--D--A--V--T--L--H--C--M--K--F--E--R  
Sola2-6\_Aae\_1p -----K--N--F--S--L--Q--P--K--K--N--Y--D--I--D--V--E--N--H--E--A--T--S--H--G--K--G--A--C--D--G--G--V--N--K--L--V--A--R--A--S--I--Q--S--L--V--D--P--I--N--S--K--K--M--D--W--C--R--N--I--D--G--H--F--O--I--S--N--D--A--V--T--L--H--C--M--K--F--E--R  
Sola2-2\_Aae\_1p -----S--N--F--K--V--N--E--N--N--D--E--F--K--I--R--A--W--H--E--A--T--S--H--G--K--G--A--C--D--G--G--V--N--K--L--V--A--R--A--S--I--Q--S--L--V--D--P--I--N--S--K--K--M--D--W--C--R--N--I--D--G--H--F--O--I--S--N--D--A--V--T--L--H--C--M--K--F--E--R  
Sola2-3\_SP\_1p -----F--I--A--A--D--A--L--Q--K--H--N--V--Q--V--O--N--N--F--E--A--T--S--H--G--K--G--A--C--D--G--G--V--N--K--L--V--A--R--A--S--I--Q--S--L--V--D--P--I--N--S--K--K--M--D--W--C--R--N--I--D--G--H--F--O--I--S--N--D--A--V--T--L--H--C--M--K--F--E--R  
Sola2-1\_SP\_1p -----F--V--A--A--A--C--T--L--D--A--H--K--I--Q--I--N--F--E--A--T--S--H--G--K--G--A--C--D--G--G--V--N--K--L--V--A--R--A--S--I--Q--S--L--V--D--P--I--N--S--K--K--M--D--W--C--R--N--I--D--G--H--F--O--I--S--N--D--A--V--T--L--H--C--M--K--F--E--R  
Sola2-2\_SP\_1p -----F--L--F--E--L--T--Y--F--S--M--Y--S--I--Q--T--S--N--N--F--E--A--T--S--H--G--K--G--A--C--D--G--G--V--N--K--L--V--A--R--A--S--I--Q--S--L--V--D--P--I--N--S--K--K--M--D--W--C--R--N--I--D--G--H--F--O--I--S--N--D--A--V--T--L--H--C--M--K--F--E--R  
Sola2-1\_BM\_1p -----T--M--F--H--M--A--N--Y--V--S--K--I--S--N--V--E--T--I--V--H--E--A--G--H--G--K--A--P--A--I--G--A--L--K--R--R--A--D--D--K--V--N--M--G--C--D--I--S--G--I--D--S--F--C--V--K--G--T--C--K--G--D--I--R--I--N--N--D--V--S--D--V--Q--I--R  
Sola2-1\_Hrobusta\_1p -----M--N--F--Y--L--S--T--O--I--Y--K--L--G--F--T--D--A--S--N--F--E--A--G--H--G--K--A--P--A--I--G--A--L--K--R--R--A--D--D--K--V--N--M--G--C--D--I--S--G--I--D--S--F--C--V--K--G--T--C--K--G--D--I--R--I--N--N--D--V--S--D--V--Q--I--R  
Dfa-2 -----E--L--L--S--F--C--I--D--I--K--K--S--P--S--Q--S--L--N--R--V--D--Q--E--S--Q--Y--R--G--K--S--D--V--R--H--F--A--L--S--N--T--A--Q--S--K--C--Y--D--H--Y--T--G--D--P--I--K--G--G--D--R--C  
Ppa-1 -----E--L--L--S--Y--H--T--L--K--Q--V--A--D--P--N--T--P--N--K--Y--K--V--L--N--T--E--P--Y--H--G--K--S--C--H--F--S--M--V--R--A--I--A--D--K--S--F--I--D--S--Y--T--D--D--V--I--N--A--I--K--S--T--D--N--N--Q--R--T--Y--L--T--S--E--R--K--A--V--T--I--K--V--T--E--H--N--P--R--E

610 620  
Sola2-2\_HM\_1p -----V--A--T--C--S--T--P--C--R--N--H--C--P--Q--S--L--T--(131)  
Sola2-5\_HM\_1p -----L--L--I--A--T--T--P--C--R--S--F--C--P--P--S--S--H--(124)  
Sola2-1\_HM\_1p -----Y--T--G--V--T--T--P--C--R--S--F--C--P--H--L--G--D--N--(133)  
Sola2-4\_Nv1\_1p -----S--A--A--P--S--V--T--K--I--S--C--A--L--V--S--P--D--K--(19)  
Sola2-5\_Aae\_1p -----P--D--K--V--K--T--V--P--C--Q--K--Y--C--M--P--I--S--D--T--(25)  
Sola2-6\_Aae\_1p -----Y--S--K--A--I--T--O--C--T--Q--K--Y--H--S--P--V--S--V--D--(23)  
Sola2-2\_Aae\_1p -----E--S--N--L--V--P--P--C--K--K--S--S--P--K--D--E--R--(44)  
Sola2-3\_SP\_1p -----P--D--S--A--S--P--N--G--I--S--R--M--F--M--K--H--V--N--N--E--(103)  
Sola2-1\_SP\_1p -----F--I--Q--A--K--P--T--I--G--R--M--F--L--K--V--K--D--E--(101)  
Sola2-2\_SP\_1p -----M--A--N--V--S--A--L--P--N--H--N--T--V--V--P--L--R--K--H--(186)  
Sola2-1\_BM\_1p -----A--D--A--N--K--V--R--P--K--L--R--I--Q--I--T--W--S--S--K--S--(111)  
Sola2-1\_Hrobusta\_1p -----L--L--L--T--A--P--A--C--T--M--K--V--Q--L--Y--T--D--T--E--L--(196)  
Dfa-2 -----L--L--L--T--A--P--A--C--T--M--K--V--Q--L--Y--T--D--T--E--L--(196)  
Ppa-1 -----L--L--Q--K--E--I--K--I--P--F--E--T--E--P--R--Q--F--L--D--N--R--(547)
