# Supplementary material for: Homologues of bacterial TnpB_IS605 are widespread in diverse eukaryotic transposable elements
Source: PubMed Central journal article supplement (PMC3627910; doi:10.1186/1759-8753-4-12), 2013-04-01
Supplement: 1759-8753-4-12-S14.pdf [file 1759-8753-4-12-S14.pdf]

Additional file 14

```

Mci-2A -----MAMNCDYAYAAVEEAA-----QTADKAKVREKNTTKSERRKK 42
Crypton-1_Mci MPRQTLKNTQAEVDIIVAHENHCDELVEKYIPHFLDIWRNNKRLQSQENGAPVETVSDTVPSFLNTEGYDAALOEEDRQMOSQAYSIDIKNRSYNTTIVTYGYROI 110
CryptonF-1_CI -----MATPTLNSQSALMVMEARV-----HALDSALDARPKKTRMQESROB 44
CryptonF-2_TS -----MESISNGLLEQDRQLELHAKILHLSQ-KVAHRIQKRPAAATTRQYDSROK 50

Mci-2A EFLFWCHKH--CPFGALNEIPDRKLFHFLVTVQVLAQSQRD-ELLERAA-----MTSDIV-----KRVGLATVVMYIAAVVDLHN-EQSL-ADPHSNRPHHCKLVD 136
Crypton-1_Mci EELLFQEKYYASMP-LADRQANRKLLEAFMMREIVERRVQKAVESYDEPKATVDISQFESVINNEGGKLLSYSTCNIIYVCAVADLWAYOHVGRNDQ---PSERTKLIITN 217
CryptonF-1_CI EWRHFQRTK--GFQDG--EIVTEQKLLWELSECVGRPAKRKCHSRDRTN-----ENGEPVV-----QLGQPSIKAYKAAIVNLWISYQRCRTNEH---PHFVGOAVRA 137
CryptonF-2_TS EETDFGTE--GFEDG--QVVTQKLVYELDHYVNRPIRPRYLRNRTD-----SQGAADV-----QLGLSPVKAFTSAIVDLRFRQOSLGTNEY---PNRERHLVGA 143

Mci-2A LLQSLKYEQRKFRDNYVDRGVGTVAIDGYSTAEVVKLVDPHYR-----KNTQEGLRNGTAFLLQHYGLLRGSEIRMMFFPDLQCVLFFN-EGISTCVALVM- 232
Crypton-1_Mci ILKIVRQREAKENRDNDVRAIESVASGYTTVEQVNCISRKLIN-IV-----NBOGYOYSFRNSLAPLLSAYLLLRGSEIRNLELADLQFMELKMKSNSTSYFAITC 318
CryptonF-1_CI LLETHSRQHEERKKAEFVDRGAGTLLDGYHE-KDIVRLVEYCVQGG-----SESKKQOSVEPHLRTAVDFLMGHSMLLRGSEIRRTAQLADITFLELITN-EGPIPCFPMVL 240
CryptonF-2_TS MINKHGFDETRKRTQFTDRGFNTLDQGYTS-ENLRRAIVRYCAGLSDQTRGRKFOAQFAYLRTTVDLFLGFMMLLRGEDRHLLELADITFTRMD--EGPIPCFPMVL 249

Mci-2A VLKQKKTNOEGRLEESACLRNKNILICPQMMLSCYLFYRWHLAGEFFPDENENRDWFDYKLTN---SRNDPKASISYDHHLCVKEAFKAVGLNSKAK-THAMRSGSRM 338
Crypton-1_Mci VFHQKKTNRFNKTESTACLRNREVEACPFMAMALHFSRYHRYKEFFPSLDCNKDWFKMKVIHVPLAKKHLHAPISKTAHTREMKYAIQANLVVKNKLTMPRICGARM 428
CryptonF-1_CI IMGNGKTNQGRLEFATVMRHCNPLICTMAQTAFYLFYRWDIVREPPPOHNRQDNYQLHLIK---GDIVRKPLSYETQLDNIRIYSGTGLSGLKK-THAGRAAGARH 345
CryptonF-2_TS MKLNGKKTNOEGRLEEMGVVRAKDPLLCTICTHTAFYLFYRWHLAGEFFPDENENRDWFDYKLTN---SRNDPKASISYDHHLCVKEAFKAVGLNSKAK-THAMRSGSRM 354

Mci-2A AEMFGTSEAAIQLRGRWNSALTSNMLTHLPRBALRFLAGF-TKDAQGFYLVRFSTVMPPEELLVKVFPRVDYLERISKEEVLG----- 421
Crypton-1_Mci ASMAGVPEEVRFRQGRWNOVLTNCVINVLPRQFIRAMAGF--EKDSLHLPRAEPEEQAALKDMVFPVVDNKKAKIKNGEVKE----- 510
CryptonF-1_CI AEQVWSEGGIRRRAGRWNSCALSQVLTNIPRKFVRAMAGFDSRTFCNFYLRARVFPVESLERAWPWPVDDMMRWFSYSYDAQDPNSCLQGPPELRRFSDQSGPWPQGRGP 455
CryptonF-2_TS AEIQGVDENSIRRAGRWNOVLTNCVINVLPRQFIRAMAGF--EKDSLHLPRAEPEEQAALKDMVFPVVDNKKAKIKNGEVKE-----VELSKLDLPLPLLVQQG- 456

Mci-2A -----SSTAADGFLNLLVQMFVVFLODSVILKQKEDFLLMFDFLFDLFLQFERY----- 473
Crypton-1_Mci -----QSASASHFHALTCTFKTLLLODAVMMDLHPDPIWKDPIEKTDLELDEKRRVNSHVAANVIPSQVILTELELBEVQOETAKKTAID-----QHSVNSRLDA 609
CryptonF-1_CI SAVRLRDDLAAQGFIRLHHLRVLVLODSVILQPLFPGLPWLTSVPMREDDYRQAEAVRVANTHKEEPEYEMOLOOTVPMVADQIRIQQDLGVACGHLTALETGLQK 565
CryptonF-2_TS -VEKCDQDDLAQSEFLKLLSSFRVLIQXAVFLQEFEGSMWTHLEFRSDEQSESOCHIDLVRTSETHEIKLRQTIELVANRITTTGENLEHIIQLNHQQTQDSIRA 565

Mci-2A ----- 473
Crypton-1_Mci TINGVQVLS-----LPASSVNSPFNSPSPSTNNIPSSTATTSNIPAAATSSASNPRRFQANGVPDEKMSRGLTIVTEQLHCEWYTGIGGDWVVAELBATWG 710
CryptonF-1_CI INNQCEALTSGGVSLVRAFPAQGRMMTAAAAFEDKDEERDSGSTASREAQA-----ACSLGVAPASASASVPATYQLSRTITIVPDLWQEWYTGIGGDWVVAELBATWG 671
CryptonF-2_TS IQSQMDQLFSGEVTFARLTGSDEKPSIPGNTTQSSTEQNTAHTVVQSLQVTENPIQDHPPGHLHPNEPSSGSPFFYRMSRTITVTEQLHCEWYTGIGGDWVVAELBATWG 675

Mci-2A ----- 473
Crypton-1_Mci TQWRNLNDR-KFVNIIRCVLSAISDLENDLGLSTTAAEQLQDVMARNNWSLHKLGVQLONGNFYPCVETKRRKLNQ 785
CryptonF-1_CI AKWRPGGTFRMYSRRKVIDIDYINRQRQGSAGSAAVELELWRQRKGLSLNRLSRLRVKVKLP----- 736
CryptonF-2_TS CRWRSDNKEVFFSRRKVIDIDWIQARVSKGILLADAIDELELWRNRNSQRLLYQLQALAKGV----- 737

```
