# Supplementary material for: Homologues of bacterial TnpB_IS605 are widespread in diverse eukaryotic transposable elements
Source: PubMed Central journal article supplement (PMC3627910; doi:10.1186/1759-8753-4-12), 2013-04-01
Supplement: 1759-8753-4-12-S15.pdf [file 1759-8753-4-12-S15.pdf]

Additional file 15

```

Mci-5          ---MSNINVSRLRQRORLQSDSHQNEETNSQANQRHRHTVYKR-GTLEAVLNNANRYMCRFSIQEITYQTALGLLENRFKGI-SVSRQLGFAMLACRYSFPR 105
Harbinger2-1_HM ---MIKLSQVFNQLLIFNSDNTINDEBLLLYDYNKSNLNLNSYQSYPRFNLDNMSVDEAKSEFRFLSKDIYEMIDLNIPEKTCYNGITISADEAFCHFLKRFAYPCR 107
Harbinger2-1_SP ---MANLHRVQDAMMAYAFDVDDVDFILMDINTSNLDFQHDG-GHFELDDFNDDERSYF-EKKDDIFRUKHALGVFDRITLPNRSRMDGLEBALCLGLQRYAYPCR 105
Harbinger2-2_NV ---MSTFRDAFEALLLANDLEVDDDELLLQNLNKSKNLDIPEFKYDRFDLESITDDECLSEFRFKNDIYRINEALNFDQITCPNRLTVDGMBALCMTLRFAYPCR 107
Harbinger2-2_HM MTAIINSIKTARSDSLIAYSEDIDDCEFALLYQISYSRDI-YPHWDYNKFNLSLDDAQCWTDLRFKRTDLPHLNIFRLPDVTKCTQGTICRGMELCMLKRLAFPCR 109
Harbinger2-1_ES -----MFEAYTDMWMAYNMAFLYTMASLYTDDVATRVAR-----RDVTNFFSPQDCINFLRFQPOQLMLLDLILIEAFTRTDCGFVAVSGREALCVLLYRLAFPCR 96

Mci-5          YGDMERVPMPHRQNIQKVCCKMEDMVEIDKMKYGLQ-FNTHQFREENLKKFAAAIDEAGALHPNVVGFIDGTLOQVSRPATDDDDMQKSLYNGWKVHAIKYQAVITPDGIT 214
Harbinger2-1_HM YQDMIPRFSRFPVQLCMISNHIMNLLAQWGLLFTNLNQGLDTQHEEMFAAAHAKGAPLTCWGFIDGTLRFISREHEQ---RILYNGHKRCHCIKQSLVAPNGLI 214
Harbinger2-1_SP YGDLVKDYRRFPVQLCLAFNWTNFIIDAHKRLFTTLEQHWLAPQQRIYADVHQRGAPLNCCWGFIDGTVRFICREGEHQ---RVAYNGHKRVHSLKYQSVTSPNGMI 212
Harbinger2-2_NV YEDLVPRARAVPQISMVVNEAVSYIYTNRYLSSFNQAWLSPAHEDEYARLWALKGAALDNCWGFIDGTVRFICREGLHQ---RTMYNGHKRVHAIKQSVVAPNGLI 214
Harbinger2-2_HM YTDLANTFGRNPTFCILIFNTVIDHVYNKLSLKLILLWDPMLQSNLRQPADYTHGRGAPLDCWGFIDGTVRRIARPKTNO---RIVYNGHKRVHAIKQSVIVVNGMI 216
Harbinger2-1_ES LKDMRLVEGLSESCISETFNWMHLHLEFKWGLLS-IDVERLKPR-LVEEAEALYNADCPETHCWGFIDGTVRGI-AEVRFC---RWYNGHKRKHAIKFCGVIPTDGLF 200

Mci-5          SSMGPPVIGARHDKFMYTMLQTEKRLQKYLHISDREKDNYAIYGDPAVEESEHHCPLDKTFPSQSTDPLEIECNKSMKVRIVAVEWEFAEVMKYFSYCKMKYAMKVDSE 324
Harbinger2-1_HM ANLYGPPVEGRHDSGMLADSNLNLKLAIV--CSFNNSREPICVYGDPAVPHRVNLQCGFKGAN----LSPBOLIWKNKMSKVRVAVWVFGDIVNYRFLDKKLNKVGLS 318
Harbinger2-1_SP ANLYGPPVEGRHDAAYLLRESGLLTMLEG--GSHDAENLLCIYGDPAVYVVRPQLQAPFPTAN----LTPBQAAFNRRAMSKVRIIVENWSEGDVINFEKRYTDPKKSQKILLS 316
Harbinger2-2_NV ANLFGPIEGKRHDSAMLHESGLLPLLER--HAINTAGQPLCIYGDPAVPLRAQLQCFPRGRN----LQAQQLFNLMSKVRIVAVENWVNDISTYFALDKKDLKIGLS 318
Harbinger2-2_HM ANLAGPFEGRHDSMTLCEGGLLQQLQ--FAWHD-GRPTCLYGDPAVPIGVHLLAPYRSLN----LTPDCHAFNRRAMSAHRVSVWVFGDMTNYRFLDKKQSQKIGLS 319
Harbinger2-1_ES VDMGPPVIGARHDSYLLAQEGMLKQKLAIV--HSNPSGHPYCIYGDPAVGLSDHLCAPFSASSHG-PLTPDMADFNQRMSSHCRVAVWVFGDMTNYRFLDKKQSQKIGLS 307

Mci-5          NPAKVYIILSTFKMLHCAVQGYSTFAKFKVNPPTLEDVILQGMRRREKIEGEDM 380
Harbinger2-1_HM PVSKMYLVCALMHNARVCLYG--STTYEYDCPPSLSDVFK----- 358
Harbinger2-1_SP SCAKMYMVSAILTNAHTCIYQ--NNTSSYBELQPPSLDEVFQ----- 356
Harbinger2-2_NV PVCKMYIVCALLRNANTCIYQ--SSTSQFFGLDPPDLEVFQ----- 358
Harbinger2-2_HM PICKVYIVCSLIQNAHTCIYQ--NIVSDYFGLFAPSLEVFQ----- 359
Harbinger2-1_ES PVGKQYLVATLLSLHSCNLNG--NQISQFEDVQPPTEQVPLKV----- 349

```
